# Supplementary material for: Isoptericola rhizosphaerae sp. nov. and Isoptericola aurantiacus sp. nov. two novel bacteria isolated from rhizosphere soil
Source: Research Square preprint supplement (doi:10.21203/rs.3.rs-6337750/v1), 2025-04-23
Supplement: Supplementary file 1 [file f0c595627d3c3762c3c93969.docx]

***Isoptericola rhizosphaerae* sp. nov. and** ***Isoptericola aurantiacus* sp. nov. two novel bacteria isolated from rhizosphere soil**

**Haifei Liu1, Quan Yang1, Jiawei Li1,** **Fei Yang1, Caifei Li1, Ding Li1, Ying Sun1, Lifang Yang2, Mingguo Jiang1, ***

1School of Marine Science and Biotechnology, Guangxi Key Laboratory for Polysaccharide Materials and Modifications, Guangxi Minzu University, Nanning 530008, PR China;

2 School of Chemistry and Chemical Engineering, Guangxi Key Laboratory of Chemistry and Engineering of Forest Products, Guangxi Minzu University, Nanning 530008, PR China;

***Authors for correspondence**

**Mingguo Jiang**

Tel & Fax: +86-771-3267023

Email: mzxyjiang@163.com ORCID:0000-0003-2279-5740


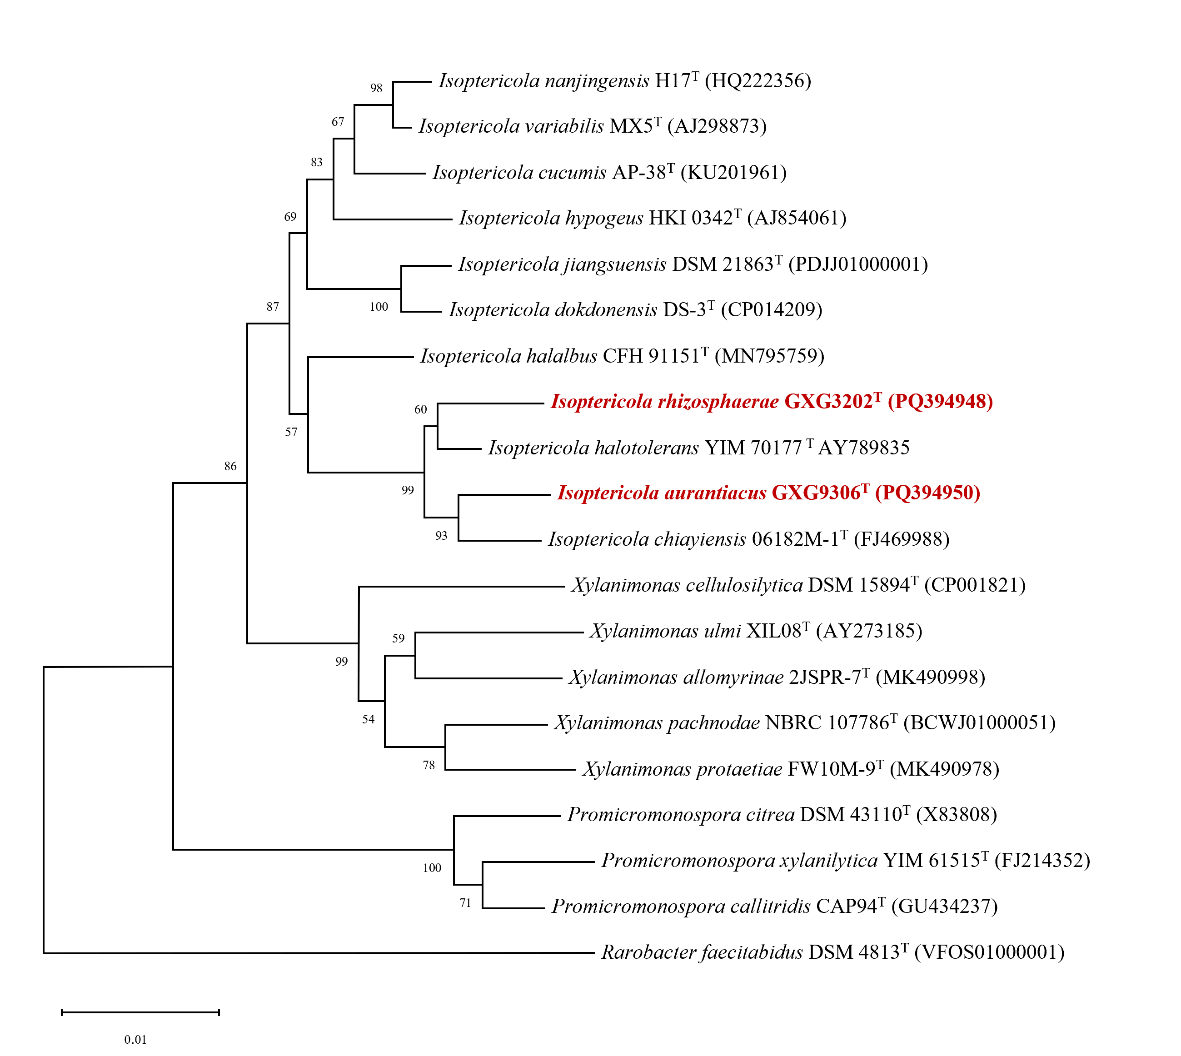
**Fig. S1** Phylogenetic tree based on the Neighbor-Joining tree using 16S rRNA gene sequences. The tree illustrates that the two novel species (indicated in red type) cluster with a clade of related species of *Isoptericola*.


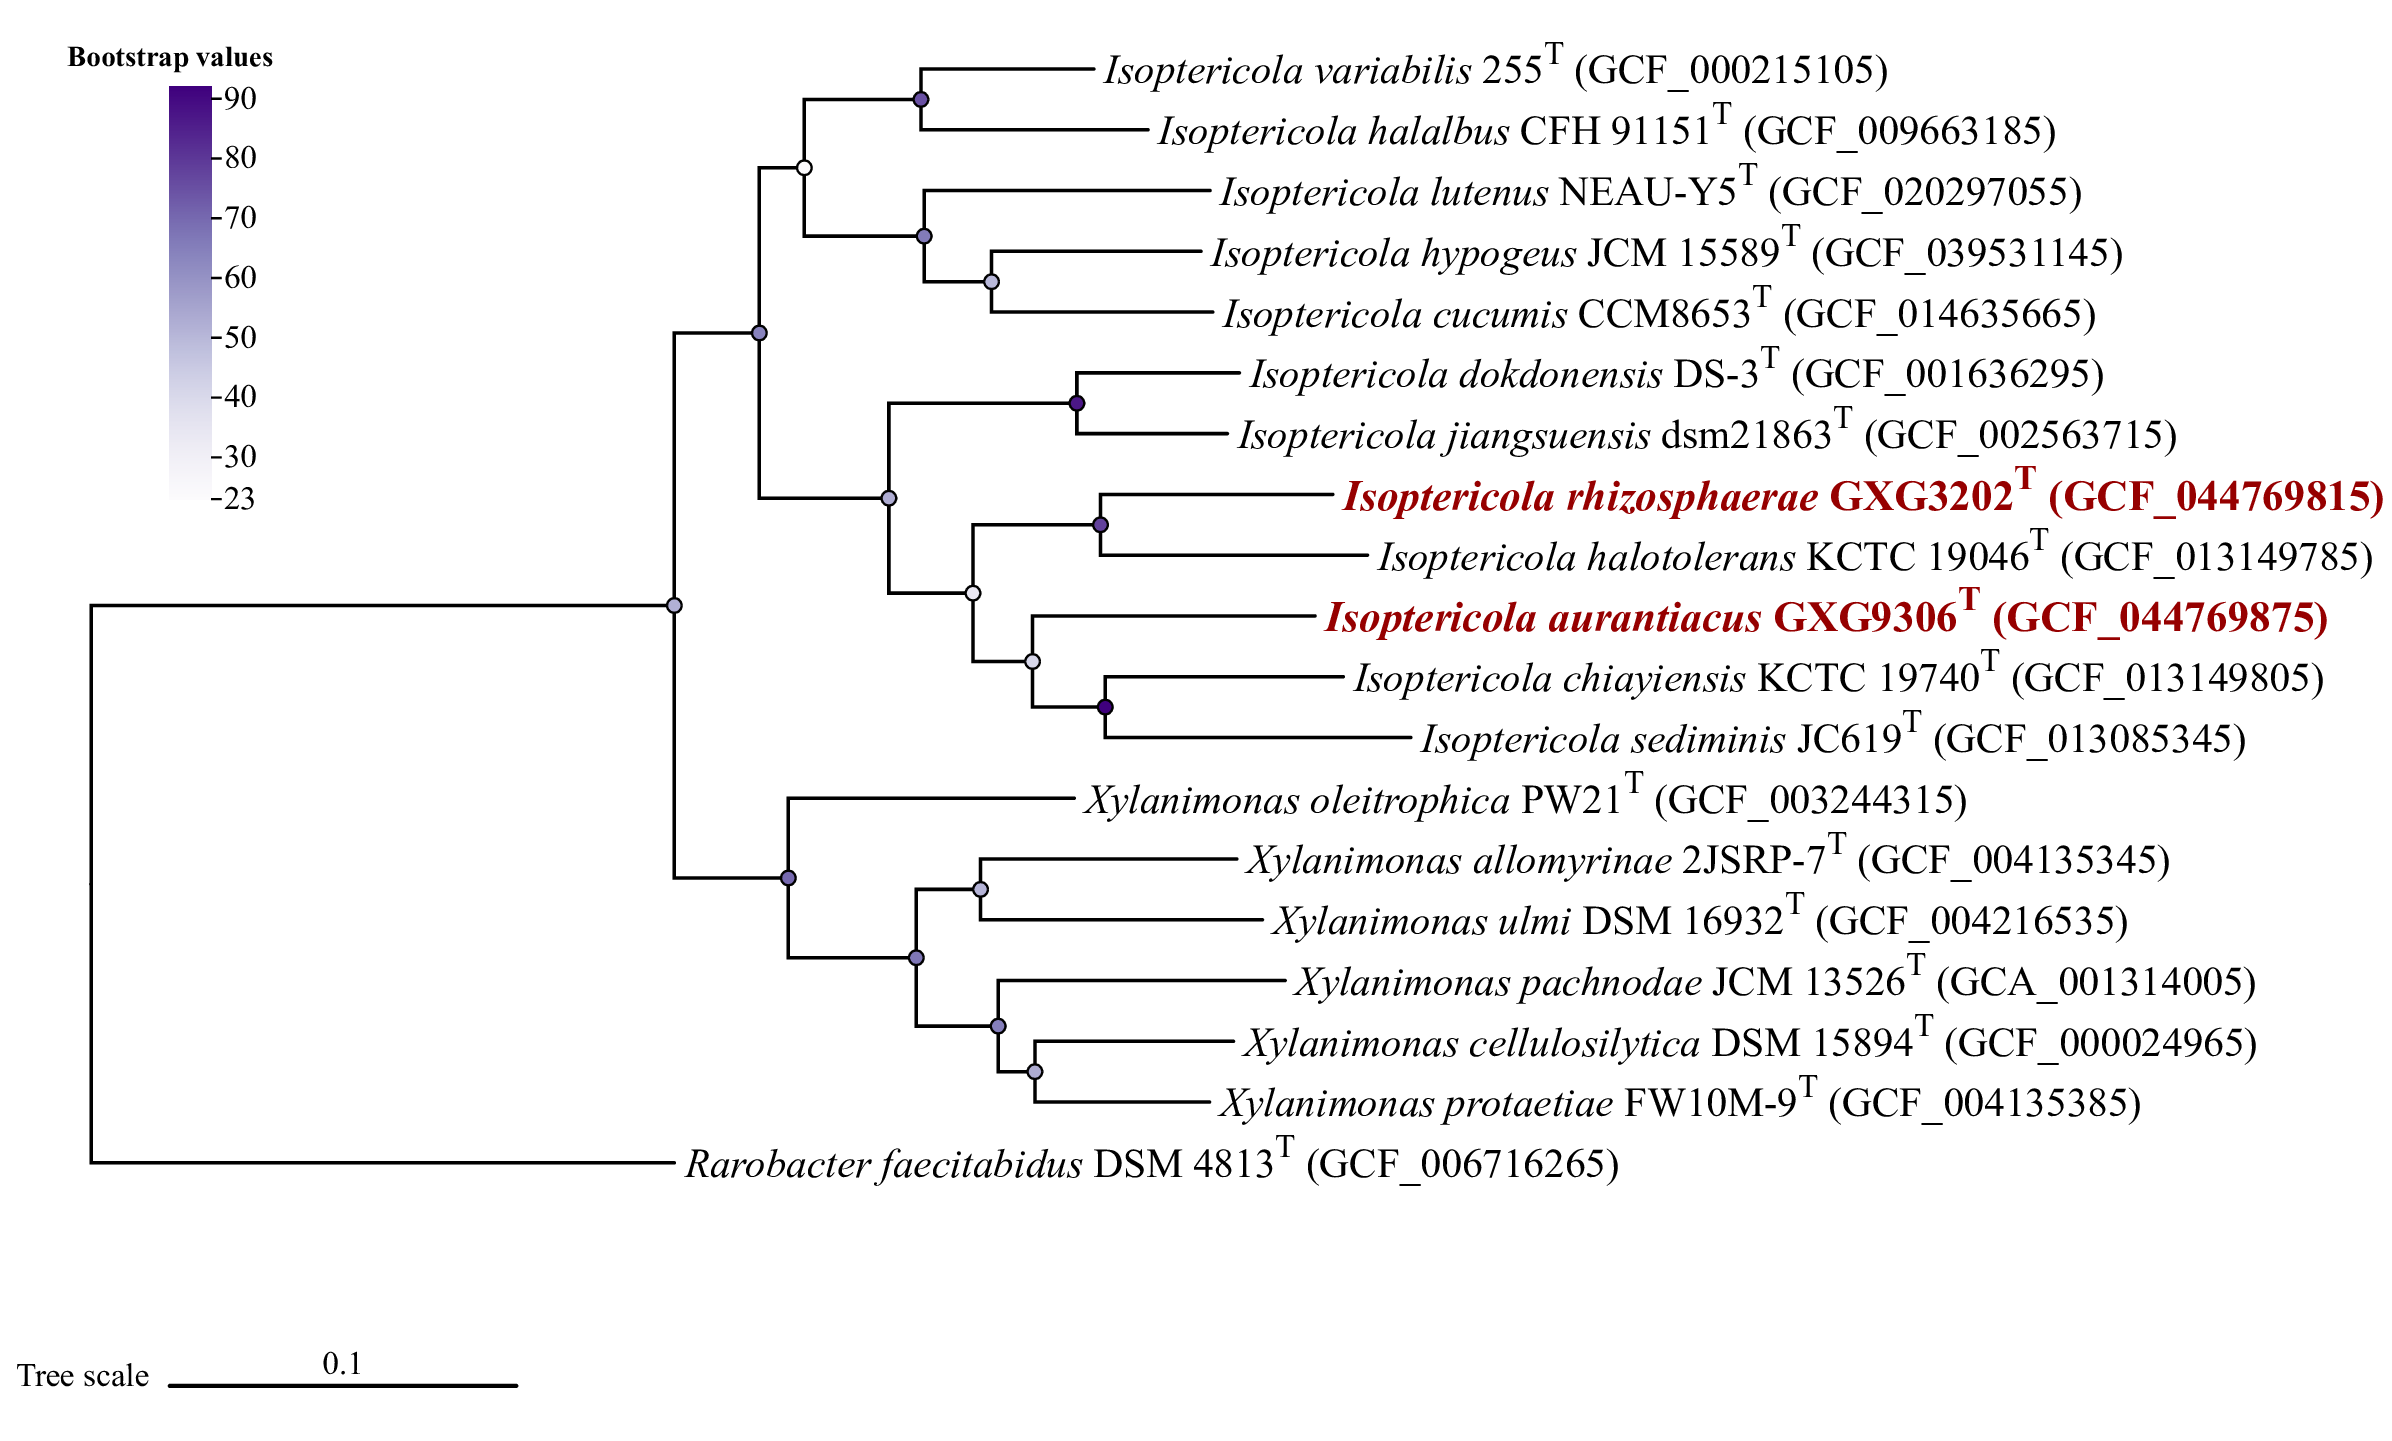


**Fig. S2** Phylogenetic tree based on publically available whole-genome sequence. Tree was constructed using UBCG. *Rarobacter faecitabidus* DSM 4813T(GCF_004135385) was used as an outlier.


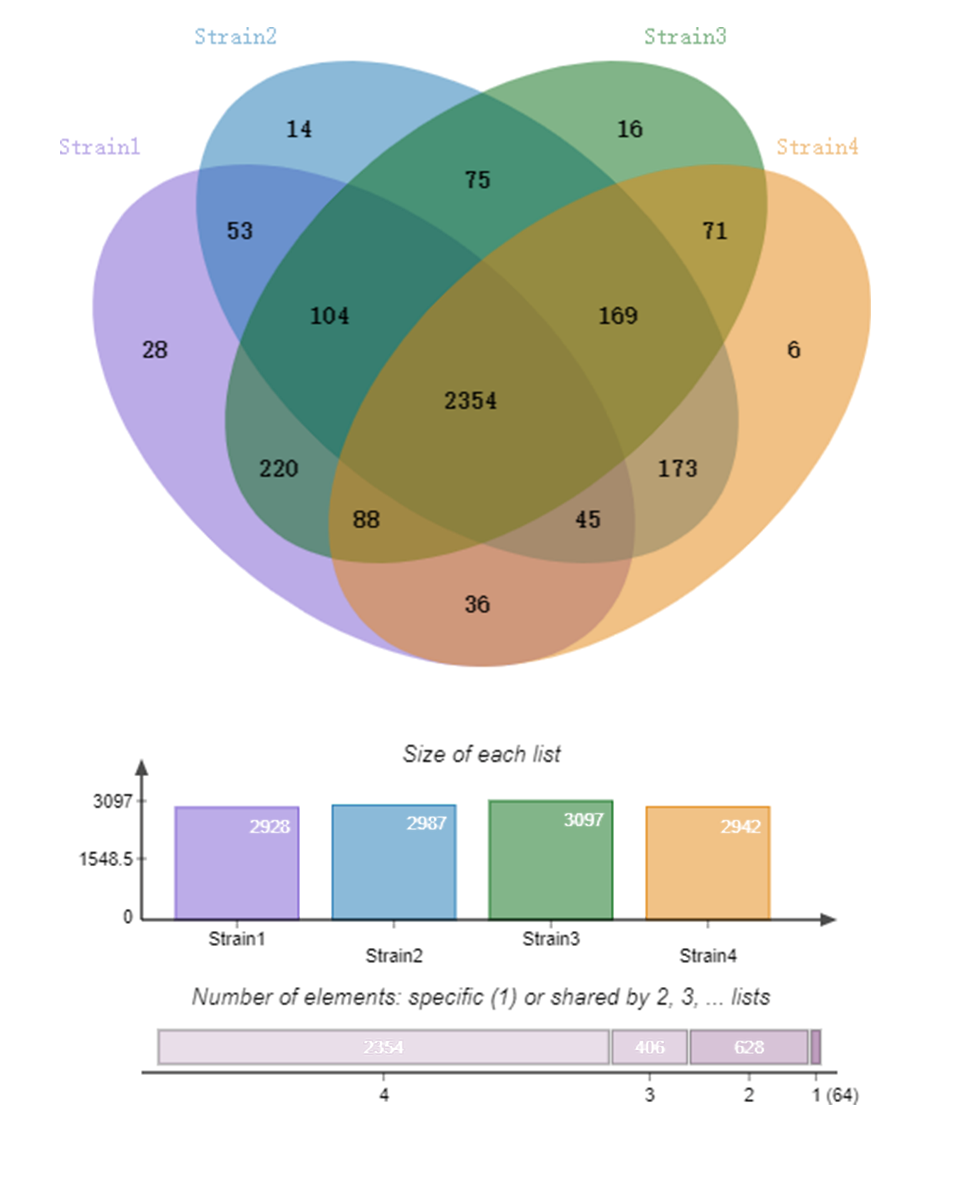
**Fig. S3** Venn diagram of the comparative ortholog analysis of four related genomes. Venn diagram was constructed using OrthoVenn3. Strain 1, GXG3202T; Strain 2, GXG9306T; Strain 3, *I. chiayiensis* 06182M-1T; Strain 4, *I. halotolerans* YIM 70177T.


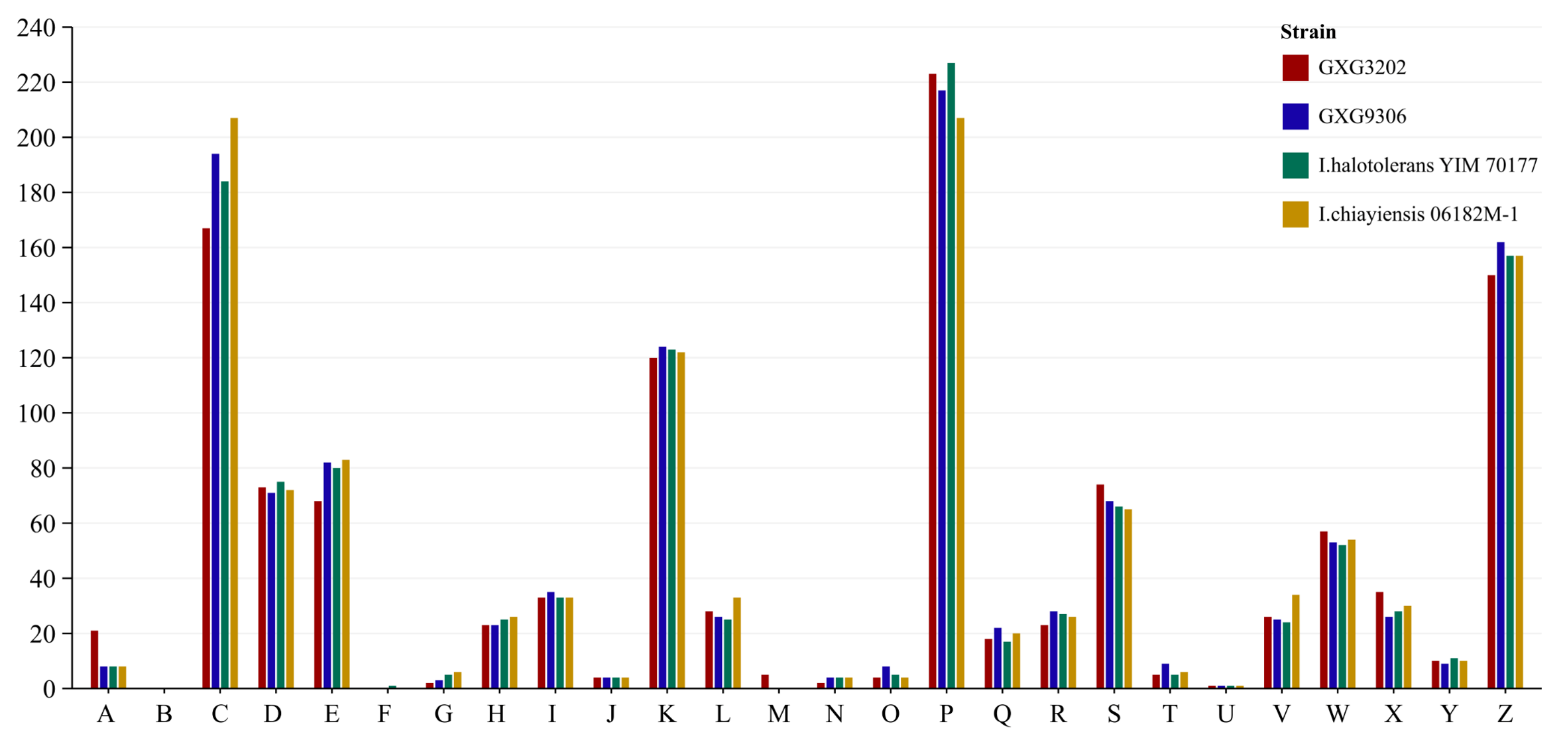
**Fig. S4** Counts of metabolic related genes annoted in GXG3202T, GXG9306T and closely related species of *Isoptericola*

A:Nitrogen Metabolism; B:Photosynthesis; C:Carbohydrates; D:DNA Metabolism; E:Nucleosides and Nucleotides; F:Phages, Prophages, Transposable elements, Plasmids; G:Iron acquisition and metabolism; H:Membrane Transport; I:RNA Metabolism; G:Secondary Metabolism;K:Cofactors, Vitamins, Prosthetic Groups, Pigments; L:Stress Response; M:Motility and Chemotaxis; N:Potassium metabolism; O:Sulfur Metabolism; P:Amino Acids and Derivatives; Q:Miscellaneous; R:Phosphorus Metabolism; S:Respiration; T:Metabolism of Aromatic Compounds; U:Dormancy and Sporulation; V:Cell Wall and Capsule; W:Fatty Acids, Lipids, and Isoprenoids; X:Virulence, Disease and Defense; Y:Regulation and Cell signaling;Z:Protein Metabolism

.

**
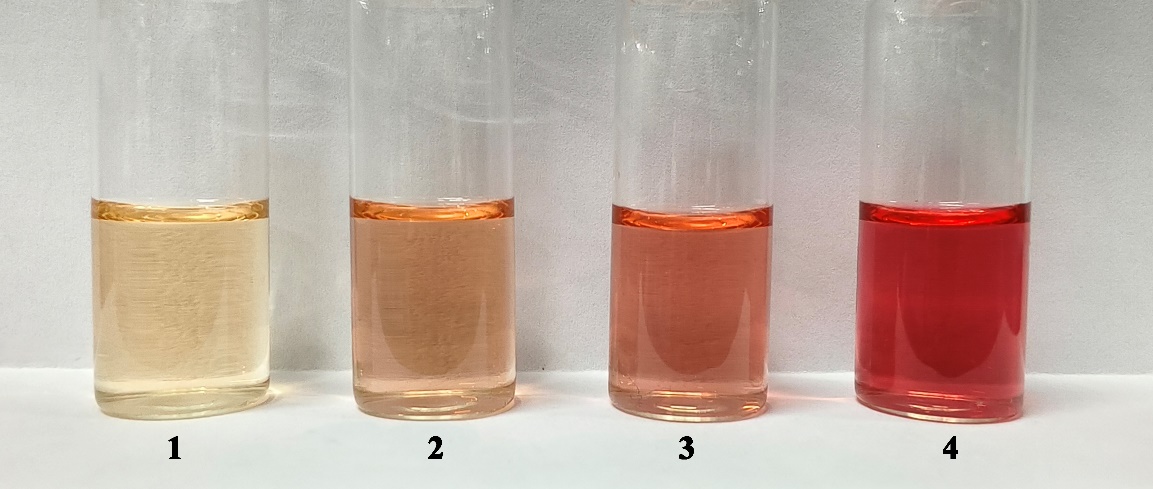
**

**
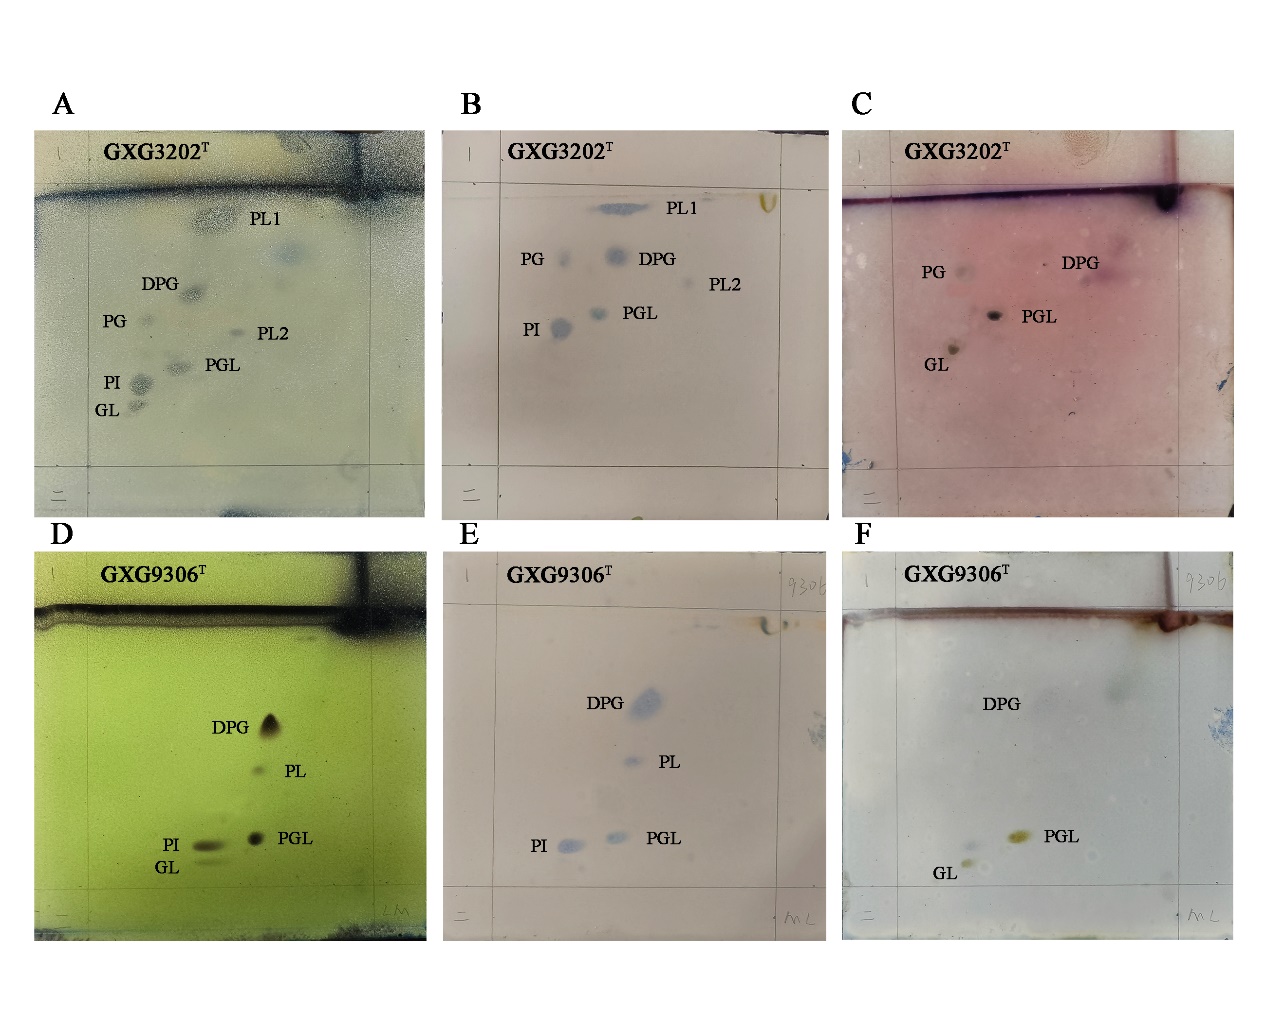
Fig. S5** Qualitative production of indole-3-acetic acid. The clearing of the solution indicates the production of IAA. “1”= LB (blank control); “2”= GXG9306T+20mg/L tryptophan+LB; “3”= GXG3202T+20mg/L tryptophan+LB; “4”= 40mg/mL IAA+LB (negative control).

**Fig. S6** Polar lipids in GXG3202T and GXG9306T as determined by two-dimensional TLC and detected with the use of molybdophosphoric acid reagent (A, D), Dittmer and Lester reagent (B, E), and Anisaldehyde reagent (C, F). The analyses were conducted in the present study. DPG: diphosphatidylglycerol; PGL: phosphoglycolipids; PI: phosphatidylinositol; GL: glycolipids; PLS: phospholipids; PG: phosphatidylglycerol.


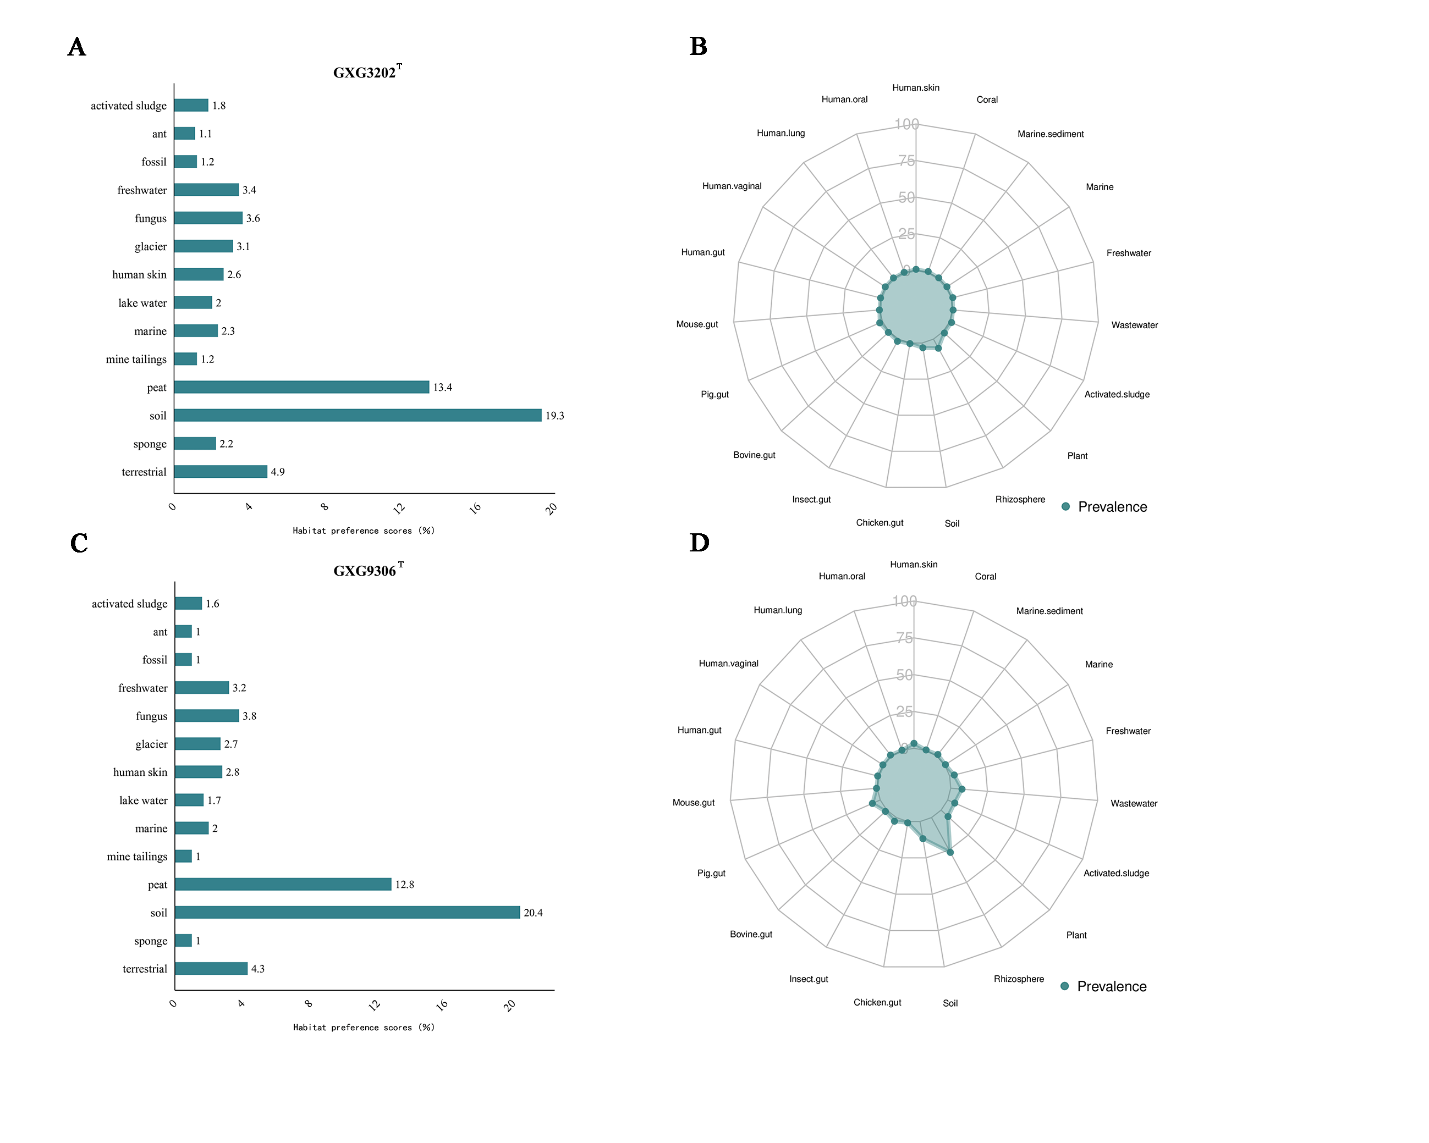


**Fig. S7** Habitat preference scores for strains GXG3202T and GXG9306T; Spider plot visualization of the habitat distribution of strains GXG3202T and GXG9306T.

**Table S1** Comparison ofANI, AAI and dDDH values between strain GXG3202T, GXG9306T and closely related species of *Isoptericola*.

| **Strain 1** | **Strain 2** | **ANI (%)** | **AAI(%)** | **dDDH (%)** | **16S rRNA gene identity (%)** |
| --- | --- | --- | --- | --- | --- |
| GXG3202T | GXG9306T | 81.1 | 79.7 | 39.1 | 98.3 |
| *I. halotolerans* YIM 70177T | 83.6 | 83.8 | 51.2 | 98.8 |
| *I. chiayiensis*  BCRC 16888T | 80.6 | 78.7 | 36.4 | 98.4 |
| GXG9306T | GXG3202T | 81.1 | 79.7 | 39.1 | 98.3 |
| *I. halotolerans*  YIM 70177T | 80.6 | 79.3 | 38.6 | 97.9 |
| *I. chiayiensis*  BCRC 16888T | 82.9 | 82.3 | 53.1 | 98.6 |

**Table S2** AntiSMASH analysis of GXG3202T, GXG9306T, and closely related species of *Isoptericola*. 1, GXG3202T; 2,GXG9306T; 3, *I. halotolerans* YIM 70177T; 4, *I. chiayiensis* 06182M-1T.

|  | **1** | **2** | **3** | ***4*** |
| --- | --- | --- | --- | --- |
| NI-siderophore | + | + | + | + |
| T3PKS* | + | + | + | – |
| Terpene | + | + | + | + |
| Ectoine | + | + | + | + |
| Lassopeptide | + | + | – | – |
| Furan | – | + | – | – |
| Betalactone | + | – | + | – |
| Arylpolyene | + | – | – | – |
| RiPP-like | + | – | – | – |
| NRPS* | – | – | + | – |
| NAPAA* | – | – | + | – |

T3PKS: Type III Polyketide synthase. NRPS: Non-ribosomal peptide synthetase. NAPAA：Non-alpha poly-amino acids like e-Polylysin.

**Table S3** Cellular fatty acid composition of GXG3202T, GXG9306T, and closely related species of *Isoptericola*. Compounds occurring at percentages of 1 or higher are presented. All data were obtained in the current study in the same laboratory under standardized conditions. ND, not determined.

| **Fatty acids (%)** | **GXG3202T** | **GXG9306T** | ***I. halotolerans***  **YIM 70177T** | ***I. chiayiensis***  **BCRC 16888T** |
| --- | --- | --- | --- | --- |
| *iso*-C14:0 | 5.0 | 4.2 | 1.3 | 1.8 |
| *iso*-C15:0 | ND | 9.8 | 4.5 | 12.1 |
| *anteiso*-C15:0 | 48.6 | 50.5 | 53.6 | 55.1 |
| C16:0 | 14.7 | 12.7 | 17.6 | 9.7 |
| *iso*-C16:0 | 9.2 | 4.7 | 2.0 | 5.1 |
| *anteiso*-C17:0 | 10.9 | 7.7 | 18.1 | 8.8 |
